# Supplementary material for: Including Cultural Context Improves Communication Outcomes for Quaternary Geoheritage: Evidence from Southeast Arabia
Source: Copernicus journal article supplement (doi:10.5194/egusphere-2025-1235), 2025-04-24
Supplement: Supplementary file 1 [file Supplement i.pdf › Supplement i.pdf]

# Supplement i Questionnaires

## S1.1 Wave 1: Survey Registration+Pre-video

---

**The impact of short videos on attitudes toward natural heritage conservation in Southeast Arabia CUREC (Ethics) Approval Reference: SOGE C1A 23 15 Survey 1 (registration and ideas before watching video)** This survey will register you to the project, and help us understand your preferences and views before you watch the video. Please note that participation is voluntary. You may withdraw at any point for any reason before submitting your answers by pressing the closing the browser. **General Information** The aim of this study is to understand if and to what extent short videos can influence people's views on natural heritage conservation in Southeast Arabia. To raise awareness of protecting natural heritage sites, communicating the importance of different types of sites is very important. This study aims to understand if and how different short videos can affect the viewers differently. We appreciate your interest in participating in this questionnaire. You have been invited to participate as you are an adult (above 18-years-old) studying at a university in Southeast Arabia, or you are an adult visitor to heritage-related museums/parks/centres, in this region. Please read through this information before agreeing to participate (if you wish to) by ticking the 'yes' box below. You may ask any questions before deciding to take part by contacting the researcher (details below). The Principal Investigator (PI) is Kenta Sayama who is attached to the School of Geography and the Environment at the University of Oxford. This project is being completed under the supervision of Dr Ash Parton, Professor Heather Viles, and Professor Adrian Parker. Through this study, you will be asked to watch a video on natural heritage sites, and answer three questionnaires (before, immediately after, and three months after watching the video). The questionnaires will ask for your opinions toward different types of natural heritage sites in Southeast Arabia, and some questions will ask for your knowledge on them. The length of the video is about 10 minutes and each survey should take about 10-15 minutes. No background knowledge is required. The collected data will be used in analysis to understand how effective the content of each video was in raising awareness of and influencing views towards different types of natural heritage sites in Southeast Arabia. Upon completing the three surveys, you may have a chance to enter a lottery to win merchandise from the University of Oxford, if you have are from one of the universities with geosciences departments in the region, or you registered through the National Museum of Oman, or Mleiha Archaeology Centre. **Do I have to take part?** No. Please note that participation is voluntary. If you do decide to take part, you may withdraw at any point for any reason before submitting your answers by pressing the closing the browser. All questions are optional, except for questions that confirms your eligibility to participate in this study. If you do not want to answer a question, you are welcome to leave the question blank.

**How will my data be used?** The data we will collect that could identify you will be your name, nationality, place of residence, and contact details. If you do not wish to disclose any of these information, you may leave the answer blank. Your IP address will not be stored<sup>[1]</sup>. We will take all reasonable measures to ensure that data remain confidential. The responses you provide will be stored in a password-protected electronic file on University of Oxford secure servers and may be used in academic publications, conference presentations, reports for external organisations, and a website. Identifiable information will be deleted as soon as it is no longer required for the research. **Who will have access to my data?** The University of Oxford is the data controller with respect to your personal data and, as such, will determine how your personal data is used in the study. The University will process your personal data for the purpose of the research outlined above. Research is a task that we perform in the public interest. Further information about your rights with respect to your

personal data is available from <https://compliance.admin.ox.ac.uk/individual-rights>. The results will be written up for an academic paper that will contribute to a DPhil (PhD equivalent) degree. **Who has reviewed this study?** This project has been reviewed by, and received ethics clearance through, a subcommittee of the University of Oxford Central University Research Ethics Committee [SOGE C1A 23 15]. **Who do I contact if I have a concern or I wish to complain?** If you have a concern about any aspect of this study, please speak to Kenta Sayama ([kenta.sayama@ouce.ox.ac.uk](mailto:kenta.sayama@ouce.ox.ac.uk)) or their supervisor Professor Heather Viles ([heather.viles@ouce.ox.ac.uk](mailto:heather.viles@ouce.ox.ac.uk)) and we will do our best to answer your query. We will acknowledge your concern within 10 working days and give you an indication of how it will be dealt with. If you remain unhappy or wish to make a formal complaint, please contact the Chair of the Research Ethics Committee at the University of Oxford who will seek to resolve the matter as soon as possible: Social Sciences & Humanities Interdivisional Research Ethics Committee; Email: [ethics@socsci.ox.ac.uk](mailto:ethics@socsci.ox.ac.uk); Address: Research Services, University of Oxford, Boundary Brook House, Churchill Drive, Headington, Oxford OX3 7GB

**You do not have to prepare anything before answering this survey. It is not a test, and you are not expected to know everything about the questions you are being asked. Please do not worry if you answer "I don't know" to any of these questions.** All questions to this survey are optional. If you do not want to answer a question, you are welcome to leave the question blank. If you have a concern about any aspect of this study, please speak to Kenta Sayama ([kenta.sayama@ouce.ox.ac.uk](mailto:kenta.sayama@ouce.ox.ac.uk)) or his supervisor Professor Heather Viles ([heather.viles@ouce.ox.ac.uk](mailto:heather.viles@ouce.ox.ac.uk)) and we will do our best to answer your query. We will acknowledge your concern within 10 working days and give you an indication of how it will be dealt with. If you remain unhappy or wish to make a formal complaint, please contact the Chair of the Research Ethics Committee at the University of Oxford who will seek to resolve the matter as soon as possible: Social Sciences & Humanities Interdivisional Research Ethics Committee; Email: [ethics@socsci.ox.ac.uk](mailto:ethics@socsci.ox.ac.uk); Address: Research Services, University of Oxford, Boundary Brook House, Churchill Drive, Headington, Oxford OX3 7GB

---

Q71 Please note that you may only participate in this survey if you are 18 years of age or over.

☐ I certify that I am 18 years of age or over (1)

---

Q72 If you have read the information above and agree to participate with the understanding that the data (including any personal data) you submit will be processed accordingly, please tick the box below to start the survey.

☐ Yes, I agree to take part (1)

---

Q1 What is your name?

---

---

Q2 What is your nationality?

- ☐ Oman (1)
- ☐ UAE (2)
- ☐ Other (3) \_\_\_\_\_
- 

Q3 Where do you live?

- ☐ Oman (1)
- ☐ UAE (2)
- ☐ Other (3) \_\_\_\_\_
- 

Q4 How can the researchers contact you (regarding links to surveys, reminders to answer surveys)?

- ☐ Only through email (1)
- ☐ Through email and WhatsApp (2)
- 

Q5 What is your email address?

\_\_\_\_\_

---

Display This Question:

*If How can the researchers contact you (regarding links to surveys, reminders to answer surveys)? = Through email and WhatsApp*

Q6 What is your phone (WhatsApp) number?

---

---

Q7 Please describe your profession

- ☐ University student (geology) (1)
- ☐ University student (archaeology) (2)
- ☐ University student (other disciplines) (3)
- ☐ Working (geology related) (4)
- ☐ Working (archaeology related) (5)
- ☐ Working (another field) (6)
- ☐ Retired (7)
- ☐ Unemployed (8)
- ☐ Other (9) \_\_\_\_\_

Q8 What is your highest educational background

- ☐ Secondary School Graduate (1)
- ☐ Studying in University (undergraduate) (2)
- ☐ Studying in University (postgraduate) (3)
- ☐ Undergraduate degree (4)
- ☐ Postgraduate degree (5)
- ☐ Other (6) \_\_\_\_\_

Q9 Where did you hear about this study?

- ☐ German University of Technology in Oman (1)
- ☐ Khalifa University (2)
- ☐ Mleiha Archaeological Centre (3)
- ☐ Oman National Museum (4)
- ☐ Sultan Qaboos University (5)
- ☐ UAE University (6)
- ☐ University of Sharjah (7)
- ☐ Social Media (9)
- ☐ Friends (10)
- ☐ NYUAD (11)
- ☐ Sorbonne Abu Dhabi (12)
- ☐ Other (8) \_\_\_\_\_

---

Q10 Do you prefer to answer the surveys in English or in Arabic?

☐ English (1)

☐ Arabic (2)

---

In this section, you will be answering questions about Natural Heritage Sites.  
Natural Heritage sites are all types of heritage sites that involve natural features, including plants, landscapes, rivers, forests, caves, and animals.

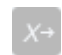

Q1 How much do you know about Natural Heritage sites?

☐ I don't know anything about it (1)

☐ I don't know very much about it (2)

☐ I have some knowledge about it (3)

☐ I have a good amount of knowledge about it (4)

☐ I have extensive knowledge about it (5)

☐ I prefer not to answer (0)

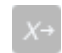

Q2 How interested are you to learn about Natural Heritage sites?

- ☐ I am very interested (I would look for information about it myself) (1)
- ☐ I am interested (I would learn about it if I get an opportunity) (2)
- ☐ I am a little interested (I would read a few sentences about it if I see it on the news or on my social media feed) (3)
- ☐ I am not so interested (I am not sure if I would learn about it even if it is on the news or on my social media feed) (4)
- ☐ I am not interested at all (5)
- ☐ I prefer not to answer (0)

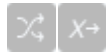

Q3 Which types of these Natural Heritage sites in the UAE or Oman have you visited?  
[You can choose multiple answers for this question]

- ☐ Mountains (1)
- ☐ Beaches (2)
- ☐ Sand Dunes (3)
- ☐ Sabkhas (4)
- ☐ Water Springs (5)
- ☐ Waterfalls (6)
- ☐ Tufas (rock waterfalls) (7)
- ☐ Wadis (8)
- ☐ Caves (9)
- ☐ Others (10) \_\_\_\_\_
- ☐ None above (11)
- ☐ I prefer not to answer (12)

---

Q4 Out of 0 (not at all important) to 10 (top priority), how important is it for you to protect Natural Heritage sites?

0 1 2 3 4 5 6 7 8 9 10



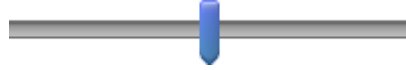

In this section, you will be answering questions about Geoheritage, or Geological Heritage sites. Geoheritage sites include Natural Heritage sites that are related to non-living features of nature. In other words, these sites are natural heritage sites without parts that involve live animals or plants.

Geoheritage sites are important to understand the evolution of the Planet Earth and to think about topics such as natural resources, natural hazards, and evolution of life.

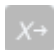

Q5 How much do you know about Geoheritage sites?

- ☐ I don't know anything about it (1)
- ☐ I don't know very much about it (2)
- ☐ I have some knowledge about it (3)
- ☐ I have a good amount of knowledge about it (4)
- ☐ I have extensive knowledge about it (5)
- ☐ I prefer not to answer (0)

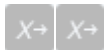

Q6 Do you know of any Geoheritage sites in Oman or the UAE?

- ☐ Yes (1)
- ☐ No (2)
- ☐ I prefer not to answer (0)

---

*Display This Question:*

*If Do you know of any Geoheritage sites in Oman or the UAE? = Yes*

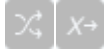

Q6.1 Which geoheritage sites do you know of?

- ☐ Semail (Oman/UAE) ophiolite (1)
  - ☐ Al Hoota Cave (2)
  - ☐ Jebel Faya/Jebel Buhaia (3)
  - ☐ Rub Al Khali Desert (4)
  - ☐ As Shaiyya Sands (Wahiba Sands) (5)
  - ☐ Bimma Sink Hole (6)
  - ☐ Jebel Hafeet (7)
  - ☐ Jebel Al Akhdar (8)
  - ☐ Abu Dhabi Sabkha (9)
  - ☐ Bander Al Khyran lagoons (10)
  - ☐ Ruwais Fossil Site (11)
  - ☐ Duqm Rock Garden (12)
  - ☐ Al Wathba Fossil Dunes (13)
  - ☐ Others (14) \_\_\_\_\_
-

*Display This Question:*

*If Do you know of any Geoheritage sites in Oman or the UAE? = Yes*

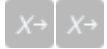

Q6.2 Have you visited any geoheritage sites in the UAE or Oman

- ☐ Yes (1)
- ☐ No (2)
- ☐ I prefer not to answer (0)

---

*Display This Question:*

*If Have you visited any geoheritage sites in the UAE or Oman = Yes*

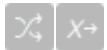

Q6.3 Which geoheritage sites have you visited? [You can select multiple answers for this question]

- ☐ Semail (Oman/UAE) ophiolite (1)
- ☐ Al Hoota Cave (2)
- ☐ Jebel Faya/Jebel Buhais (3)
- ☐ Rub Al Khali Desert (4)
- ☐ As Shaqiyya Sands (Wahiba Sands) (5)
- ☐ Bimma Sink Hole (6)
- ☐ Jebel Hafeet (7)
- ☐ Jebel Al Akhdar (8)
- ☐ Abu Dhabi Sabkha (9)
- ☐ Bander Al Khyran lagoons (10)
- ☐ Ruwais Fossil Site (11)
- ☐ Duqm Rock Garden (12)
- ☐ Al Wathba Fossil Dunes (13)
- ☐ Others (14) \_\_\_\_\_



Q7 How interested are you to learn about Geoheritage sites?

- ☐ I am very interested (I would look for information about it myself) (1)
- ☐ I am interested (I would learn about it if I get an opportunity) (2)
- ☐ I am a little interested (I would read a few sentences about it if I see it on the news or on my social media feed) (3)
- ☐ I am not so interested (I am not sure if I would learn about it even if it is on the news or on my social media feed) (4)
- ☐ I am not interested at all (5)
- ☐ I prefer not to answer (0)

---

Q8 Out of 0 (not important at all) to 10 (top priority), how important is it for you to protect Geoheritage sites?

|                                    |                                                                                      |   |   |   |   |   |   |   |   |   |    |
|------------------------------------|--------------------------------------------------------------------------------------|---|---|---|---|---|---|---|---|---|----|
|                                    | 0                                                                                    | 1 | 2 | 3 | 4 | 5 | 6 | 7 | 8 | 9 | 10 |
| Importance of Geoheritage Sites () |  |   |   |   |   |   |   |   |   |   |    |

In this section, you will be answering questions about Quaternary Geoheritage sites. Quaternary geoheritage sites are Geoheritage sites from the Quaternary period, which is the past 2.5 million years. This period is very important to understand the Earth as we know today and to understand humans and other animals that live in our planet right now. If you do not know anything about these sites, please do not hesitate to answer that you do not know.

Quaternary Geoheritage sites include different landforms that are considered very young as a Geoheritage site. They are important to understand why the landscape in today's world look the way it does, and to understand climate change in the past, present, and the future.

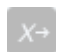

Q9 How much do you know about Quaternary Geoheritage sites?

- ☐ I don't know anything about it (1)
- ☐ I don't know very much about it (2)
- ☐ I have some knowledge about it (3)
- ☐ I have a good amount of knowledge about it (4)
- ☐ I have extensive knowledge about it (5)
- ☐ I prefer not to answer (0)

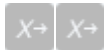

Q10 Do you know of any Quaternary Geoheritage sites in Oman or the UAE?

- ☐ Yes (1)
- ☐ No (2)
- ☐ I prefer not to answer (0)

---

*Display This Question:*

*If Do you know of any Quaternary Geoheritage sites in Oman or the UAE? = Yes*

Q10.1 Which Quaternary Geoheritage sites do you know?

(If you cannot remember the name of the site, please describe what the site to the best of your ability)

---

---

*Display This Question:*

*If Do you know of any Quaternary Geoheritage sites in Oman or the UAE? = Yes*

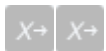

Q10.2 Have you visited any Quaternary Geoheritage sites in the UAE or Oman

- ☐ Yes (1)
- ☐ No (2)
- ☐ I prefer not to answer (0)

---

*Display This Question:*

*If Have you visited any Quaternary Geoheritage sites in the UAE or Oman = Yes*

Q10.3 Which Quaternary Geoheritage sites have you visited?

(If you cannot remember the name of the site, please describe what the site to the best of your ability)

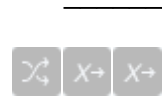

Q11 Please select all photos that you think are from Quaternary Geoheritage sites from the photos below. [Please select multiple, if you think there are more than one correct answers]. If you have no idea about the answer, please feel free to select "I don't know the answer".

- ☐ 1 (1)
- ☐ 2 (2)
- ☐ 3 (3)
- ☐ 4 (4)
- ☐ 5 (5)
- ☐ I don't know the answer (6)
- ☐ I prefer not to answer (0)
-



Q12 How interested are you to learn about Quaternary Geoheritage sites?

- ☐ I am very interested (I would look for information about it myself) (1)
- ☐ I am interested (I would learn about it if I get an opportunity) (2)
- ☐ I am a little interested (I would read a few sentences about it if I see it on the news or on my social media feed) (3)
- ☐ I am not so interested (I am not sure if I would learn about it even if it is on the news or on my social media feed) (4)
- ☐ I am not interested at all (5)
- ☐ I prefer not to answer (0)

---

Q13 Out of 0 (not important at all) to 10 (top priority), how important is it for you to protect Quaternary Geoheritage sites?

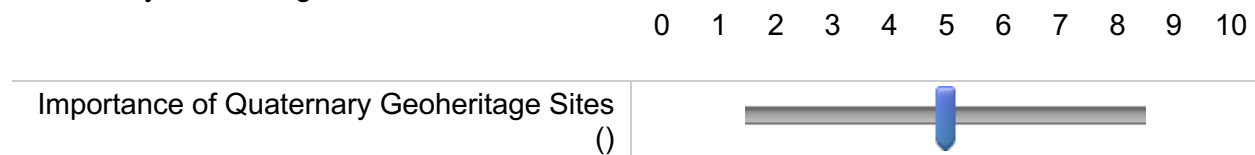

---

In this section, you will be answering questions about Archaeological sites.

Archaeological sites include sites related to lives of humans in the past.

Archaeological sites are important to understand the lives of humans in the past and to think about the development of the human society.

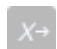

Q14 How much do you know about Archaeological sites?

- ☐ I don't know anything about it (1)
  - ☐ I don't know very much about it (2)
  - ☐ I have some knowledge about it (3)
  - ☐ I have a good amount of knowledge about it (4)
  - ☐ I have extensive knowledge about it (5)
  - ☐ I prefer not to answer (0)
- 



Q15 Do you know of any Archaeological sites in Oman or the UAE?

- ☐ Yes (1)
  - ☐ No (2)
  - ☐ I prefer not to answer (0)
- 

*Display This Question:*

*If Do you know of any Archaeological sites in Oman or the UAE? = Yes*

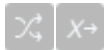

Q15.1 Which Archaeological sites do you know of? [You can select multiple answers for this question]

☐

Al Bidya Mosque (1)

☐

Bat, Al-Khutm and Al-Ayn (Oman) (2)

☐

Jebel Faya/Jebel Buhais (Mleiha Archaeological Centre) (3)

☐

Hili Archaeological Park (4)

☐

Qalhat (5)

☐

Jebel Hafit (6)

☐

Bayt Al Qefl (7)

☐

Wadi Ghadun (8)

☐

Others (9) \_\_\_\_\_

-----

Display This Question:

If Do you know of any Archaeological sites in Oman or the UAE? = Yes

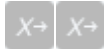

Q15.2 Have you visited any archaeological in the UAE or Oman?

- ☐ Yes (1)
- ☐ No (2)
- ☐ I prefer not to answer (0)

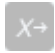

Q16 How interested are you to learn about Archaeological sites?

- ☐ I am very interested (I would look for information about it myself) (1)
- ☐ I am interested (I would learn about it if I get an opportunity) (2)
- ☐ I am a little interested (I would read a few sentences about it if I see it on the news or on my social media feed) (3)
- ☐ I am not so interested (I am not sure if I would learn about it even if it is on the news or on my social media feed) (4)
- ☐ I am not interested at all (5)
- ☐ I prefer not to answer (0)

Q17 Out of 0 (not important at all) to 10 (top priority), how important is it for you to protect Archaeological sites?

0 1 2 3 4 5 6 7 8 9 10

|                                       |  |
|---------------------------------------|--|
| Importance of Archaeological sites () |  |
|---------------------------------------|--|

In this section you will be answering questions about the Geocultural connections, or the connections between Quaternary Geoheritage sites and Archaeological sites.

Quaternary Geoheritage sites have developed and changed after humans were living on the Earth, so there are relationships that you can find between these two types of sites, which can be very interesting for scientists and for the public. This section will ask you about these relationships.

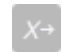

Q18 Do you know anything about how Quaternary geology and archaeology are related?

- ☐ No (1)
- ☐ Yes, I know a little bit (2)
- ☐ Yes, I know a lot (3)
- ☐ I prefer not to answer (0)

---

*Display This Question:*

*If Do you know anything about how Quaternary geology and archaeology are related? = Yes, I know a little bit*

*Or Do you know anything about how Quaternary geology and archaeology are related? = Yes, I know a lot*

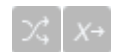

Q18.1 Which of these are examples of the relationship between the Quaternary geology and archaeology in Southeast Arabia. [Please select multiple, if you think there are more than one

correct answers]

☐

Ancient people making stone tools out of specific types of local rocks (1)

☐

The relationship between people moving to different areas for better lives and changes in the climate/environment (2)

☐

The relationship between location of tall mountains and location of forts/castles (3)

☐

The relationship between the location of ancient lakes/rivers and archaeological sites (4)

☐

The relationship between dinosaurs and asteroids (5)

☐

The local type of rocks and the materials used to construct buildings in the past (6)

☐

The change in animals that people hunted for food and the change in climate/environment (7)

☐

I prefer not to answer (0)

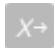

Q19 How interested are you to learn about the Geocultural relationship, or the relationship between Quaternary Geoheritage sites and Archaeological sites?

- ☐ I am very interested (I would look for information about it myself) (1)
  - ☐ I am interested (I would learn about it if I get an opportunity) (2)
  - ☐ I am a little interested (I would read a few sentences about it if I see it on the news or on my social media feed) (3)
  - ☐ I am not so interested (I am not sure if I would learn about it even if it is on the news or on my social media feed) (4)
  - ☐ I am not interested at all (5)
  - ☐ I prefer not to answer (0)
-

## S1.2 Wave 2: Survey Post-Video

---

**The impact of short videos on attitudes toward natural heritage conservation in Southeast Arabia CUREC (Ethics) Approval Reference: SOGE C1A 23 15 Survey 2 (After watching video)** This survey will help us understand if and how your preferences and views have changed after you watched the video. Please note that participation is voluntary. You may withdraw at any point for any reason before submitting your answers by pressing the closing the browser.

**The only preparation you need before answering is watching the video that you received with the link to this survey. It is not a test, and you do not have to know answers to every question. Please do not worry if you answer "I don't know" to any of these questions.** All questions to this survey are optional. If you do not want to answer a question, you are welcome to leave the question blank. If you have a concern about any aspect of this study, please speak to Kenta Sayama ([kenta.sayama@ouce.ox.ac.uk](mailto:kenta.sayama@ouce.ox.ac.uk)) or their supervisor Professor Heather Viles ([heather.viles@ouce.ox.ac.uk](mailto:heather.viles@ouce.ox.ac.uk)) and we will do our best to answer your query. We will acknowledge your concern within 10 working days and give you an indication of how it will be dealt with. If you remain unhappy or wish to make a formal complaint, please contact the Chair of the Research Ethics Committee at the University of Oxford who will seek to resolve the matter as soon as possible: Social Sciences & Humanities Interdivisional Research Ethics Committee; Email: [ethics@socsci.ox.ac.uk](mailto:ethics@socsci.ox.ac.uk); Address: Research Services, University of Oxford, Boundary Brook House, Churchill Drive, Headington, Oxford OX3 7GB

---

In this section, you will be answering questions about Geoheritage, or Geological Heritage sites in general.

Geoheritage sites include Natural Heritage sites that are related to non-living features of nature. In other words, these sites are natural heritage sites without parts that involve live animals or plants.

Geoheritage sites are important to understand the evolution of the Planet Earth and to think about topics such as natural resources, natural hazards, and evolution of life.

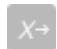



Q6 How interested are you to learn about Geoheritage sites in general?

- ☐ I am very interested (I would look for information about it myself) (1)
- ☐ I am interested (I would learn about it if I get an opportunity) (2)
- ☐ I am a little interested (I would read a few sentences about it if I see it on the news or on my social media feed) (3)
- ☐ I am not so interested (I am not sure if I would learn about it even if it is on the news or on my social media feed) (4)
- ☐ I am not interested at all (5)
- ☐ I prefer not to answer (0)

---

Q7 Out of 0 (not important at all) to 10 (top priority), how important is it for you to protect Geoheritage sites?

0 1 2 3 4 5 6 7 8 9 10

|                                    |                                                                                      |
|------------------------------------|--------------------------------------------------------------------------------------|
| Importance of Geoheritage Sites () |  |
|------------------------------------|--------------------------------------------------------------------------------------|

In this section, you will be answering questions about Quaternary Geoheritage sites. Quaternary geoheritage sites are Geoheritage sites from the Quaternary period, which is the past 2.5 million years. This period is very important to understand the Earth as we know today and to understand humans and other animals that live in our planet right now.

Quaternary Geoheritage sites include different landforms that are considered very young as a Geoheritage site. They are important to understand why the landscape in today's world look the way it does, and to understand climate change in the past, present, and the future.

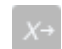

Q1 How much do you know about Quaternary Geoheritage sites?

- ☐ Very well (1)
- ☐ Quite well (2)
- ☐ I know the basics (3)
- ☐ Not very much (4)
- ☐ None at all (5)
- ☐ I prefer not to answer (0)

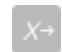

Q2 Do you know of any Quaternary Geoheritage sites in Oman or the UAE?

- ☐ Yes (1)
- ☐ No (2)
- ☐ I prefer not to answer (0)

---

*Display This Question:*

*If Do you know of any Quaternary Geoheritage sites in Oman or the UAE? = Yes*

Q2.1 Which Quaternary Geoheritage sites do you know?

(If you cannot remember the name of the site, please describe what the site to the best of your ability)

---

*Display This Question:*

*If Do you know of any Quaternary Geoheritage sites in Oman or the UAE? = Yes*

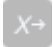

Q2.2 Have you visited any Quaternary Geoheritage sites in the UAE or Oman

- ☐ Yes (1)
- ☐ No (2)
- ☐ I prefer not to answer (0)

---

*Display This Question:*

*If Have you visited any Quaternary Geoheritage sites in the UAE or Oman = Yes*

Q2.3 Which Quaternary Geoheritage sites have you visited?

(If you cannot remember the name of the site, please describe what the site to the best of your ability)

---

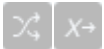

Q3 Please select all photos that you think are from Quaternary Geoheritage sites from the photos below. If you have no idea about the answer, please feel free to select "I don't know the answer".

☐

1 (1)

☐

2 (2)

☐

3 (3)

☐

4 (4)

☐

5 (5)

☐

I don't know the answer (0)

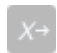

Q4 How interested are you to learn about Quaternary Geoheritage sites?

☐ I am very interested (I would look for information about it myself) (1)

☐ I am interested (I would learn about it if I get an opportunity) (2)

☐ I am a little interested (I would read a few sentences about it if I see it on the news or on my social media feed) (3)

☐ I am not so interested (I am not sure if I would learn about it even if it is on the news or on my social media feed) (4)

☐ I am not interested at all (5)

☐ I prefer not to answer (0)

---

Q5 Out of 0 (not important at all) to 10 (top priority), how important is it for you to protect Quaternary Geoheritage sites?

0 1 2 3 4 5 6 7 8 9 10

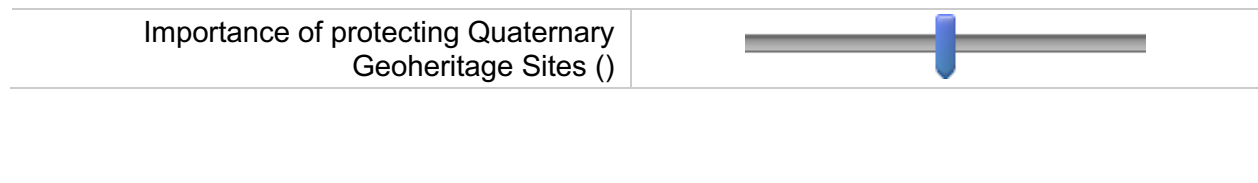

In this section, you will be answering questions about Archaeological sites.

Archaeological sites include sites related to lives of humans in the past.

Archaeological sites are important to understand the lives of humans in the past and to think about the development of the human society.

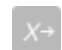

Q8 How much do you know about Archaeological sites?

- ☐ Very well (1)
- ☐ Quite well (2)
- ☐ I know the basics (3)
- ☐ Not very much (4)
- ☐ None at all (5)
- ☐ I prefer not to answer (0)

---

Q9 Do you know of any Archaeological sites in Oman or the UAE?

- ☐ Yes (1)
  - ☐ No (2)
-

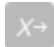

Q10 How interested are you to learn about Archaeological sites?

- ☐ I am very interested (I would look for information about it myself) (1)
  - ☐ I am interested (I would learn about it if I get an opportunity) (2)
  - ☐ I am a little interested (I would read a few sentences about it if I see it on the news or on my social media feed) (3)
  - ☐ I am not so interested (I am not sure if I would learn about it even if it is on the news or on my social media feed) (4)
  - ☐ I am not interested at all (5)
  - ☐ I prefer not to answer (0)
- 

Q11 Out of 0 (not important at all) to 10 (top priority), how important is it for you to protect Archaeological sites?

0 1 2 3 4 5 6 7 8 9 10

|                                                      |  |
|------------------------------------------------------|--|
| Importance of protecting Archaeological sites<br>( ) |  |
|------------------------------------------------------|--|

In this section you will be answering questions about the Geocultural connections, or the connections between Quaternary Geoheritage sites and Archaeological sites.

Quaternary Geoheritage sites have developed and changed after humans were living on the Earth, so there are relationships that you can find between these two types of sites, which can be very interesting for scientists and for the public. This section will ask you about these relationships.

---

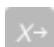

Q12 Do you know anything about how Quaternary geology and archaeology are related?

- ☐ Yes, I know a lot (1)
- ☐ Yes, I know a little bit (2)
- ☐ No (3)
- ☐ I prefer not to answer (0)

---

*Display This Question:*

*If Do you know anything about how Quaternary geology and archaeology are related? = Yes, I know a little bit*

*Or Do you know anything about how Quaternary geology and archaeology are related? = Yes, I know a lot*

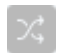

Q12.1 Which of these are examples of the relationship between the Quaternary geology and archaeology in Southeast Arabia. [Please select multiple, if you think there are more than one correct answers]

- ☐ Ancient people making tools out of specific types of local rocks (1)
- ☐ The relationship between people moving to different areas for better lives and changes in the climate/environment (2)
- ☐ The relationship between location of tall mountains and location of forts/castles (3)
- ☐ The relationship between ancient lakes/rivers and archaeological finds (4)
- ☐ The relationship between dinosaurs and asteroids (5)
- ☐ The local type of rocks and the materials used to construct buildings (6)
- ☐ The change in animals that people hunted for food and the change in climate/environment (7)

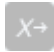

Q13 How interested are you to learn about the Geocultural relationship, or the relationship between Quaternary Geoheritage sites and Archaeological sites?

- ☐ I am very interested (I would look for information about it myself) (1)
- ☐ I am interested (I would learn about it if I get an opportunity) (2)
- ☐ I am a little interested (I would read a few sentences about it if I see it on the news or on my social media feed) (3)
- ☐ I am not so interested (I am not sure if I would learn about it even if it is on the news or on my social media feed) (4)
- ☐ I am not interested at all (5)
- ☐ I prefer not to answer (0)

Q14 Having watched the video, out of 0 (will definitely NOT read or watch anything) to 10 (will definitely read or watch some of the materials), how likely are you to read or watch materials provided with the video?

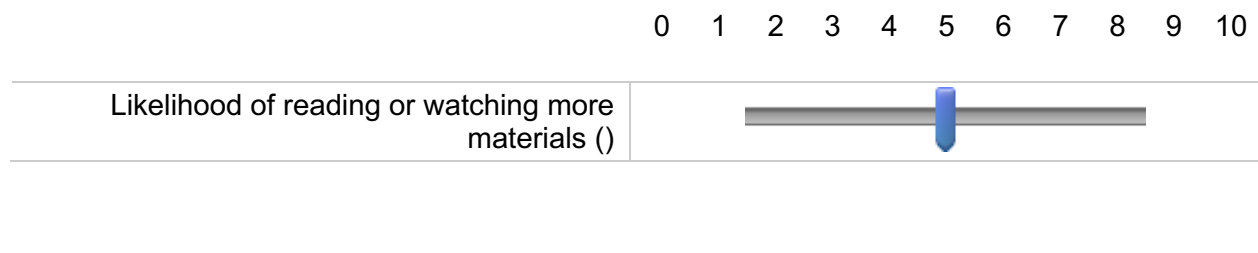



## S1.3 Wave 3: Survey 3-months-after

---

**The impact of short videos on attitudes toward natural heritage conservation in Southeast Arabia  
CUREC (Ethics) Approval Reference: SOGE C1A 23 15 Final Survey (3-months after watching Video)**

This survey will help us understand how your preferences and views have changed in a longer timeframe. It will also help understand how much you remember from the surveys as well. Please note that participation is voluntary. You may withdraw at any point for any reason before submitting your answers by pressing the closing the browser.

**You do not need any preparation before answering this survey. It is not a test, and you do not have to know answers to every question. Please do not worry if you answer "I don't know" to any of these questions.**

All questions to this survey are optional. If you do not want to answer a question, you are welcome to leave the question blank.

If you have a concern about any aspect of this study, please speak to Kenta Sayama ([kenta.sayama@ouce.ox.ac.uk](mailto:kenta.sayama@ouce.ox.ac.uk)) or their supervisor Professor Heather Viles ([heather.viles@ouce.ox.ac.uk](mailto:heather.viles@ouce.ox.ac.uk)) and we will do our best to answer your query. We will acknowledge your concern within 10 working days and give you an indication of how it will be dealt with. If you remain unhappy or wish to make a formal complaint, please contact the Chair of the Research Ethics Committee at the University of Oxford who will seek to resolve the matter as soon as possible: Social Sciences & Humanities Interdivisional Research Ethics Committee; Email: [ethics@socsci.ox.ac.uk](mailto:ethics@socsci.ox.ac.uk); Address: Research Services, University of Oxford, Boundary Brook House, Churchill Drive, Headington, Oxford OX3 7GB

---

In this section, you will be answering questions about how the video affected you. We are keen to learn what you thought about the video!

---

Q1 How many times have you watched the video?

- ☐ 1 time
  - ☐ 2 times
  - ☐ more than 3 times
-

Q2 Do you remember the contents of the video?

- ☐ Yes
  - ☐ No
  - ☐ I remember some aspects
- 

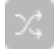

Q3 [Multiple choice] what aspects of the video left the strongest impressions for you?

- ☐ Beautiful scenery
  - ☐ Scientific importance of geoheritage sites
  - ☐ Connections between Quaternary geology and culture/archaeology
  - ☐ Interviews with local geoscientists
  - ☐ Importance of protecting geoheritage sites
  - ☐ The connection between Quaternary geology and climate change
  - ☐ Other \_\_\_\_\_
- 

Q4 What did you think of the length of the video

- ☐ Too short
  - ☐ Little too short
  - ☐ Just right
  - ☐ Little too long
  - ☐ Too long
-

Q5 Please write any comments if you remember what you liked about the video or what you learned from the video.

---

Q6 Please write any comments if you have ideas on how the video could have been improved.

---

In this section, you will be answering questions about Geoheritage, or Geological Heritage sites in general.

Geoheritage sites include Natural Heritage sites that are related to non-living features of nature. In other words, these sites are natural heritage sites without parts that involve live animals or plants.

Geoheritage sites are important to understand the evolution of the Planet Earth and to think about topics such as natural resources, natural hazards, and evolution of life.

Q6 How interested are you to learn about Geoheritage sites in general?

- ☐ I am very interested (I would look for information about it myself)
- ☐ I am interested (I would learn about it if I get an opportunity)
- ☐ I am a little interested (I would read a few sentences about it if I see it on the news or on my social media feed)
- ☐ I am not so interested (I am not sure if I would learn about it even if it is on the news or on my social media feed)
- ☐ I am not interested at all

Q7 Out of 0 (not important at all) to 10 (top priority), how important is it for you to protect Geoheritage sites?

0 1 2 3 4 5 6 7 8 9 10

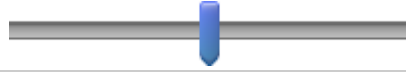

---

Q8 How did the video affect your level of interest in geoheritage sites?

- ☐ It made me less interested in geoheritage sites
- ☐ It made me a little less interested in geoheritage sites
- ☐ It did not change my interest in geoheritage sites
- ☐ It made me a little more interested in geoheritage sites
- ☐ It made me more interested in geoheritage sites

---

In this section, you will be answering questions about Quaternary Geoheritage sites. Quaternary geoheritage sites are Geoheritage sites from the Quaternary period, which is the past 2.5 million years. This period is very important to understand the Earth as we know today and to understand humans and other animals that live in our planet right now.

Quaternary Geoheritage sites include different landforms that are considered very young as a Geoheritage site. They are important to understand why the landscape in today's world looks the way it does, and to understand climate change in the past, present, and the future.

---

Q9 How much do you know about Quaternary Geoheirtage sites?

- ☐ Very well
  - ☐ Quite well
  - ☐ I know the basics
  - ☐ Not very much
  - ☐ None at all
- 

Q10 Do you know of any Quaternary Geoheritage sites in Oman or the UAE?

- ☐ Yes
  - ☐ No
- 

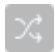

Q11 Please select all photos that you think are from Quaternary Geoheritage sites from the photos below. If you have no idea about the answer, please feel free to select "I don't know the answer".

- ☐ Image:Pillow lava
- ☐ Image:Wadi ghub
- ☐ Image:Sabkha 6 white lake ish
- ☐ Image:Cave photo
- ☐ Image:Rub al khali goudie
- ☐ I don't know the answer

Q12 How interested are you to learn more about Quaternary Geoheritage sites?

- ☐ I am very interested (I would look for information about it myself)
  - ☐ I am interested (I would learn about it if I get an opportunity)
  - ☐ I am a little interested (I would read a few sentences about it if I see it on the news or on my social media feed)
  - ☐ I am not so interested (I am not sure if I would learn about it even if it is on the news or on my social media feed)
  - ☐ I am not interested at all
- 

Q13 How did the video affect your level of interest in Quaternary geoheritage sites?

- ☐ It made me less interested in Quaternary geoheritage sites
  - ☐ It made me a little less interested in Quaternary geoheritage sites
  - ☐ It did not change my interest in Quaternary geoheritage sites
  - ☐ It made me a little more interested in Quaternary geoheritage sites
  - ☐ It made me more interested in Quaternary geoheritage sites
- 

Q14 Out of 0 (not important at all) to 10 (top priority), how important is it for you to protect Quaternary Geoheritage sites?

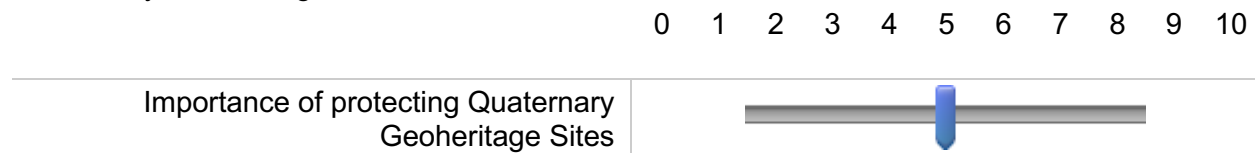

In this section, you will be answering questions about Archaeological sites.

Archaeological sites include sites related to lives of humans in the past.

Archaeological sites are important to understand the lives of humans in the past and to think about the development of the human society.

---

Q15 Do you know of any Archaeological sites in Oman or the UAE?

- ☐ Yes
- ☐ No
- 

Q16 How interested are you to learn more about Archaeological sites?

- ☐ I am very interested (I would look for information about it myself)
- ☐ I am interested (I would learn about it if I get an opportunity)
- ☐ I am a little interested (I would read a few sentences about it if I see it on the news or on my social media feed)
- ☐ I am not so interested (I am not sure if I would learn about it even if it is on the news or on my social media feed)
- ☐ I am not interested at all
- 

Q17 Out of 0 (not important at all) to 10 (top priority), how important is it for you to protect Archaeological sites?

0 1 2 3 4 5 6 7 8 9 10

Importance of protecting Archaeological sites

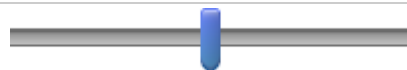

Q24 How did the video affect your level of interest in archaeological sites?

- ☐ It made me less interested in archaeological sites
- ☐ It made me a little less interested in archaeological sites
- ☐ It did not change my interest in archaeological sites
- ☐ It made me a little more interested in archaeological sites
- ☐ It made me more interested in Quaternary geoheritage sites

---

In this section you will be answering questions about the Geocultural connections, or the connections between Quaternary Geoheritage sites and Archaeological sites.

Quaternary Geoheritage sites have developed and changed after humans were living on the Earth, so there are relationships that you can find between these two types of sites, which can be very interesting for scientists and for the public. This section will ask you about these relationships.

---

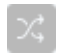

Q18 Do you know anything about how Quaternary geology and archaeology are related?

- ☐ Yes, I know a lot
- ☐ Yes
- ☐ Yes, I know a little bit
- ☐ No

---

*Display This Question:*

*If Q18 = Yes*

*Or Q18 = Yes, I know a lot*

*Or Q18 = Yes, I know a little bit*

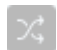



Q19.1 Which of these are examples of the relationship between the Quaternary geology and archaeology in Southeast Arabia. [Please select multiple, if you think there are more than one correct answers]

- ☐ Ancient people making tools out of specific types of local rocks
  - ☐ The relationship between people moving to different areas for better lives and changes in the climate/environment
  - ☐ The relationship between location of tall mountains and location of forts/castles
  - ☐ The relationship between ancient lakes/rivers and archaeological finds
  - ☐ The relationship between dinosaurs and asteroids
  - ☐ The local type of rocks and the materials used to construct buildings
  - ☐ The change in animals that people hunted for food and the change in climate/environment
- 

Q20 How interested are you to learn about the Geocultural relationship, or the relationship between Quaternary Geoheritage sites and Archaeological sites?

- ☐ I am very interested (I would look for information about it myself)
  - ☐ I am interested (I would learn about it if I get an opportunity)
  - ☐ I am a little interested (I would read a few sentences about it if I see it on the news or on my social media feed)
  - ☐ I am not so interested (I am not sure if I would learn about it even if it is on the news or on my social media feed)
  - ☐ I am not interested at all
-

In this section, you will be asked about your activities over the last 3 months, after watching the video for this study for the first time.

Please answer the questions honestly, to the best of your ability.

---

Q21 After watching the video for this study, did you watch or read anything more about Quaternary geoheritage, archaeology, or geoheritage in general?

- ☐ Yes
- ☐ No
- 

Q22 In the last 3 months, did you visit any Quaternary geoheritage sites?

- ☐ Yes
- ☐ No
- 

*Display This Question:*

*If Q22 = Yes*

Q22.1 Did you go to one of the sites introduced in the video?

- ☐ Yes
- ☐ No
- ☐ I don't remember
- 

Q23 Did the video make you more interested to visit Quaternary Geoheritage sites?

- ☐ Yes
- ☐ No
