# Supplementary material for: Including Cultural Context Improves Communication Outcomes for Quaternary Geoheritage: Evidence from Southeast Arabia
Source: Copernicus journal article supplement (doi:10.5194/egusphere-2025-1235), 2025-04-24
Supplement: Supplementary file 2 [file Supplement ii.pdf › Supplement ii.pdf]

# Supplement ii

## Details of the Difference in Differences Analyses

### S2.1 List of Abbreviations

WaveNum: This represents the DiD coefficient which presents the interaction effect between the treatment group and the specified survey wave. For example,  $\text{WaveNum} = 2 \times \text{TreatGroup}$  indicates how much better the treatment group did in the 2nd Wave, relative to the control group.

Num.Obs.: Number of observations used in the analysis.

R2: Coefficient of determination or R-squared, which indicates the proportion of variance in the dependent variable explained by the independent variables in the regression model. In simple terms, it is a measure of the explanatory power of the independent variables in interpreting changes in the dependent variable.

R2 Adj.: Adjusted R-squared, which adjusts the R-squared value for the number of predictors in the model.

R2 Within: R-squared within, which represents the extent of variance in the dependent variable explained by the independent variables within each group or category.

R2 Within Adj.: Adjusted R-squared within, which adjusts the R-squared within value by the number of predictors in the model within each group or category.

AIC: Akaike Information Criterion, which measures the relative quality of a statistical model for a given set of data. Lower AIC values indicate better-fitting models. These values are used in comparison with results from competing models to determine the model with the best fit for the data.

BIC: Bayesian Information Criterion, which is a value similar to AIC that measures the relative quality of the statistical model for a given set of data. Compared to the AIC, it penalises more complex models more heavily. Lower values here indicate better-fitting models.

RMSE: Root Mean Square Error, which represents the average deviation between predicted and observed outcomes from the analysis. A lower RMSE indicates a better fitting model that provides a more reliable and accurate estimates of the treatment effect.

Std.Errors: Standard errors of the coefficients estimated in the model.

FE: Fixed Effects, which indicates whether there was the inclusion of fixed effects in the regression model for specific categories such as W1\_ExperimentGroup, survey\_wave, and WaveNum.

p: p-value for the each analysis, which shows the significance of the estimated treatment effect.

## S2.2 Section 4.3.4.1

Self-reported interested in Quaternary Geoheritage—Overall

|                             | Overall                | By Wave                |
|-----------------------------|------------------------|------------------------|
|                             | 0.070***               |                        |
| WaveNum =<br>2 × TreatGroup |                        | 0.067***               |
| WaveNum =<br>3 × TreatGroup |                        | 0.073***               |
| Num.Obs.                    | 225                    | 225                    |
| R2                          | 0.054                  | 0.054                  |
| R2 Adj.                     | 0.037                  | 0.033                  |
| R2 Within                   | 0.001                  | 0.001                  |
| R2 Within Adj.              | -0.004                 | -0.009                 |
| AIC                         | 490.4                  | 492.4                  |
| BIC                         | 507.5                  | 512.9                  |
| RMSE                        | 0.70                   | 0.70                   |
| Std.Errors                  | by: W1_ExperimentGroup | by: W1_ExperimentGroup |
| FE: W1_ExperimentGroup      | X                      | X                      |
| FE: survey_wave             | X                      |                        |
| FE: WaveNum                 |                        | X                      |

\* p < 0.1, \*\* p < 0.05, \*\*\* p < 0.01

Self-reported interested in Quaternary Geoheritage —Separated by level of expertise

|                             | Specialist             | Non-Specialist         |
|-----------------------------|------------------------|------------------------|
| WaveNum =<br>2 × TreatGroup | 0.056***               | 0.003***               |
| WaveNum =<br>3 × TreatGroup | -0.056***              | 0.155***               |
| Num.Obs.                    | 108                    | 117                    |
| R2                          | 0.044                  | 0.131                  |
| R2 Adj.                     | -0.003                 | 0.092                  |
| R2 Within                   | 0.001                  | 0.003                  |
| R2 Within Adj.              | -0.018                 | -0.015                 |
| AIC                         | 204.2                  | 261.4                  |
| BIC                         | 220.3                  | 278.0                  |
| RMSE                        | 0.59                   | 0.70                   |
| Std.Errors                  | by: W1_ExperimentGroup | by: W1_ExperimentGroup |
| FE:<br>W1_ExperimentGroup   | X                      | X                      |
| FE: WaveNum                 | X                      | X                      |

\* p < 0.1, \*\* p < 0.05, \*\*\* p < 0.01

## S2.2 Section 4.3.4.2

Self-reported level of knowledge about Quaternary Geoheritage—Overall

|                             | Overall                | By Wave                |
|-----------------------------|------------------------|------------------------|
|                             | -0.169***              |                        |
| WaveNum =<br>2 × TreatGroup |                        | -0.251***              |
| WaveNum =<br>3 × TreatGroup |                        | -0.087***              |
| Num.Obs.                    | 234                    | 234                    |
| R2                          | 0.211                  | 0.212                  |
| R2 Adj.                     | 0.197                  | 0.195                  |
| R2 Within                   | 0.002                  | 0.003                  |
| R2 Within Adj.              | -0.003                 | -0.006                 |
| AIC                         | 660.6                  | 662.4                  |
| BIC                         | 667.9                  | 683.1                  |
| RMSE                        | 0.97                   | 0.97                   |
| Std.Errors                  | by: W1_ExperimentGroup | by: W1_ExperimentGroup |
| FE: W1_ExperimentGroup      | X                      | X                      |
| FE: survey_wave             | X                      |                        |
| FE: WaveNum                 |                        | X                      |

\* p < 0.1, \*\* p < 0.05, \*\*\* p < 0.01

Self-reported level of knowledge about Quaternary Geoheritage —Separated by level of expertise

|                             | Specialist             | Non-Specialist         |
|-----------------------------|------------------------|------------------------|
| WaveNum =<br>2 × TreatGroup | -0.302***              | -0.106***              |
| WaveNum =<br>3 × TreatGroup | -0.222***              | -0.101***              |
| Num.Obs.                    | 117                    | 117                    |
| R2                          | 0.285                  | 0.259                  |
| R2 Adj.                     | 0.253                  | 0.225                  |
| R2 Within                   | 0.005                  | 0.001                  |
| R2 Within Adj.              | -0.013                 | -0.017                 |
| AIC                         | 328.2                  | 311.0                  |
| BIC                         | 344.8                  | 327.5                  |
| RMSE                        | 0.93                   | 0.87                   |
| Std.Errors                  | by: W1_ExperimentGroup | by: W1_ExperimentGroup |
| FE:<br>W1_ExperimentGroup   | X                      | X                      |
| FE: WaveNum                 | X                      | X                      |

\* p < 0.1, \*\* p < 0.05, \*\*\* p < 0.01

### **S2.3 Section 4.3.4.3**

Photo quiz on Quaternary geoheritage sites, score—Overall

|                             | <b>Overall</b>         | <b>By Wave</b>         |
|-----------------------------|------------------------|------------------------|
|                             | -0.117***              |                        |
| WaveNum =<br>2 × TreatGroup |                        | -0.422***              |
| WaveNum =<br>3 × TreatGroup |                        | 0.189***               |
| Num.Obs.                    | 312                    | 312                    |
| R2                          | 0.111                  | 0.121                  |
| R2 Adj.                     | 0.100                  | 0.107                  |
| R2 Within                   | 0.001                  | 0.012                  |
| R2 Within Adj.              | -0.003                 | 0.005                  |
| AIC                         | 994                    | 992.4                  |
| BIC                         | 1012.7                 | 1014.9                 |
| RMSE                        | 1.17                   | 1.16                   |
| Std.Errors                  | by: W1_ExperimentGroup | by: W1_ExperimentGroup |
| FE: W1_ExperimentGroup      | X                      | X                      |
| FE: survey_wave             | X                      |                        |
| FE: WaveNum                 |                        | X                      |

\* p < 0.1, \*\* p < 0.05, \*\*\* p < 0.01

Photo quiz on Quaternary geoheritage sites, score—Separated by level of expertise

|                             | <b>Specialist</b>      | <b>Non-Specialist</b>  |
|-----------------------------|------------------------|------------------------|
| WaveNum =<br>2 × TreatGroup | -0.458***              | -0.386***              |
| WaveNum =<br>3 × TreatGroup | 0.490***               | -0.045***              |
| Num.Obs.                    | 144                    | 168                    |
| R2                          | 0.110                  | 0.153                  |
| R2 Adj.                     | 0.078                  | 0.127                  |
| R2 Within                   | 0.021                  | 0.008                  |
| R2 Within Adj.              | 0.007                  | -0.004                 |
| AIC                         | 500.6                  | 472.7                  |
| BIC                         | 518.4                  | 491.5                  |
| RMSE                        | 1.32                   | 0.95                   |
| Std.Errors                  | by: W1_ExperimentGroup | by: W1_ExperimentGroup |
| FE:                         |                        |                        |
| W1_ExperimentGroup          | X                      | X                      |
| FE: WaveNum                 | X                      | X                      |

\* p < 0.1, \*\* p < 0.05, \*\*\* p < 0.01

## S2.4 Section 4.3.4.4

### Protection Priority for Quaternary Geoheritage Sites—Overall

|                             | Overall                | By Wave                |
|-----------------------------|------------------------|------------------------|
|                             | 0.428***               |                        |
| WaveNum =<br>2 × TreatGroup |                        | 0.537***               |
| WaveNum =<br>3 × TreatGroup |                        | 0.319***               |
| Num.Obs.                    | 222                    | 222                    |
| R2                          | 0.050                  | 0.050                  |
| R2 Adj.                     | 0.032                  | 0.028                  |
| R2 Within                   | 0.004                  | 0.004                  |
| R2 Within Adj.              | -0.001                 | -0.005                 |
| AIC                         | 869.6                  | 871.4                  |
| BIC                         | 886.6                  | 891.8                  |
| RMSE                        | 1.68                   | 1.68                   |
| Std.Errors                  | by: W1_ExperimentGroup | by: W1_ExperimentGroup |
| FE: W1_ExperimentGroup      | X                      | X                      |
| FE: survey_wave             | X                      |                        |
| FE: WaveNum                 |                        | X                      |

\* p < 0.1, \*\* p < 0.05, \*\*\* p < 0.01

### Protection Priority for Quaternary Geoheritage Sites—Separated by level of expertise

|                             | Specialist             | Non-Specialist         |
|-----------------------------|------------------------|------------------------|
| WaveNum =<br>2 × TreatGroup | 0.227***               | 0.517***               |
| WaveNum =<br>3 × TreatGroup | 0.196***               | 0.308***               |
| Num.Obs.                    | 105                    | 117                    |
| R2                          | 0.029                  | 0.091                  |
| R2 Adj.                     | -0.020                 | 0.050                  |
| R2 Within                   | 0.002                  | 0.003                  |
| R2 Within Adj.              | -0.0019                | -0.015                 |
| AIC                         | 359.9                  | 488.7                  |
| BIC                         | 375.8                  | 505.2                  |
| RMSE                        | 1.27                   | 1.86                   |
| Std.Errors                  | by: W1_ExperimentGroup | by: W1_ExperimentGroup |
| FE:<br>W1_ExperimentGroup   | X                      | X                      |
| FE: WaveNum                 | X                      | X                      |

\* p < 0.1, \*\* p < 0.05, \*\*\* p < 0.01

## S2.5 Section 4.3.4.4

### Protection Priority for Quaternary Geoheritage Sites—Overall

|                             | Overall                | By Wave                |
|-----------------------------|------------------------|------------------------|
|                             | 0.428***               |                        |
| WaveNum =<br>2 × TreatGroup |                        | 0.537***               |
| WaveNum =<br>3 × TreatGroup |                        | 0.319***               |
| Num.Obs.                    | 222                    | 222                    |
| R2                          | 0.050                  | 0.050                  |
| R2 Adj.                     | 0.032                  | 0.028                  |
| R2 Within                   | 0.004                  | 0.004                  |
| R2 Within Adj.              | -0.001                 | -0.005                 |
| AIC                         | 869.6                  | 871.4                  |
| BIC                         | 886.6                  | 891.8                  |
| RMSE                        | 1.68                   | 1.68                   |
| Std.Errors                  | by: W1_ExperimentGroup | by: W1_ExperimentGroup |
| FE: W1_ExperimentGroup      | X                      | X                      |
| FE: survey_wave             | X                      |                        |
| FE: WaveNum                 |                        | X                      |

\* p < 0.1, \*\* p < 0.05, \*\*\* p < 0.01

### Protection Priority for Quaternary Geoheritage Sites—Separated by level of expertise

|                             | Specialist             | Non-Specialist         |
|-----------------------------|------------------------|------------------------|
| WaveNum =<br>2 × TreatGroup | 0.227***               | 0.517***               |
| WaveNum =<br>3 × TreatGroup | 0.196***               | 0.308***               |
| Num.Obs.                    | 105                    | 117                    |
| R2                          | 0.029                  | 0.091                  |
| R2 Adj.                     | -0.020                 | 0.050                  |
| R2 Within                   | 0.002                  | 0.003                  |
| R2 Within Adj.              | -0.019                 | -0.015                 |
| AIC                         | 359.9                  | 488.7                  |
| BIC                         | 375.8                  | 505.2                  |
| RMSE                        | 1.27                   | 1.86                   |
| Std.Errors                  | by: W1_ExperimentGroup | by: W1_ExperimentGroup |
| FE:<br>W1_ExperimentGroup   | X                      | X                      |
| FE: WaveNum                 | X                      | X                      |

\* p < 0.1, \*\* p < 0.05, \*\*\* p < 0.01

## S2.6 Section 4.3.5.1

Self-reported interest in the geocultural relationship—Overall

|                             | Overall                | By Wave                |
|-----------------------------|------------------------|------------------------|
|                             | 0.261***               |                        |
| WaveNum =<br>2 × TreatGroup |                        | 0.165***               |
| WaveNum =<br>3 × TreatGroup |                        | 0.357***               |
| Num.Obs.                    | 225                    | 225                    |
| R2                          | 0.045                  | 0.048                  |
| R2 Adj.                     | 0.028                  | 0.026                  |
| R2 Within                   | 0.008                  | 0.011                  |
| R2 Within Adj.              | 0.003                  | 0.002                  |
| AIC                         | 488.5                  | 489.9                  |
| BIC                         | 505.6                  | 510.3                  |
| RMSE                        | 0.70                   | 0.70                   |
| Std.Errors                  | by: W1_ExperimentGroup | by: W1_ExperimentGroup |
| FE: W1_ExperimentGroup      | X                      | X                      |
| FE: survey_wave             | X                      |                        |
| FE: WaveNum                 |                        | X                      |

\* p < 0.1, \*\* p < 0.05, \*\*\* p < 0.01

Self-reported interest in the geocultural relationship—Separated by level of expertise

|                             | Specialist             | Non-Specialist         |
|-----------------------------|------------------------|------------------------|
| WaveNum =<br>2 × TreatGroup | 0.067***               | 0.193***               |
| WaveNum =<br>3 × TreatGroup | 0.167***               | 0.562***               |
| Num.Obs.                    | 114                    | 111                    |
| R2                          | 0.011                  | 0.105                  |
| R2 Adj.                     | -0.035                 | 0.063                  |
| R2 Within                   | 0.003                  | 0.023                  |
| R2 Within Adj.              | -0.015                 | 0.004                  |
| AIC                         | 359.9                  | 488.7                  |
| BIC                         | 375.8                  | 505.2                  |
| RMSE                        | 1.27                   | 1.86                   |
| Std.Errors                  | by: W1_ExperimentGroup | by: W1_ExperimentGroup |
| FE:<br>W1_ExperimentGroup   | X                      | X                      |
| FE: WaveNum                 | X                      | X                      |

\* p < 0.1, \*\* p < 0.05, \*\*\* p < 0.01

## S2.7 Section 4.3.5.2

Self-reported knowledge in the geocultural relationship—Overall

|                             | Overall                | By Wave                |
|-----------------------------|------------------------|------------------------|
|                             | 0.037***               |                        |
| WaveNum =<br>2 × TreatGroup |                        | -0.007***              |
| WaveNum =<br>3 × TreatGroup |                        | 0.080***               |
| Num.Obs.                    | 165                    | 165                    |
| R2                          | 0.07                   | 0.041                  |
| R2 Adj.                     | 0.046                  | 0.041                  |
| R2 Within                   | 0                      | 0.001                  |
| R2 Within Adj.              | -0.006                 | -0.011                 |
| AIC                         | 298.3                  | 300.2                  |
| BIC                         | 313.9                  | 318.8                  |
| RMSE                        | 0.58                   | 0.58                   |
| Std.Errors                  | by: W1_ExperimentGroup | by: W1_ExperimentGroup |
| FE: W1_ExperimentGroup      | X                      | X                      |
| FE: survey_wave             | X                      |                        |
| FE: WaveNum                 |                        | X                      |

\* p < 0.1, \*\* p < 0.05, \*\*\* p < 0.01

Self-reported knowledge in the geocultural relationship—Separated by level of expertise

|                             | Specialist             | Non-Specialist         |
|-----------------------------|------------------------|------------------------|
| WaveNum =<br>2 × TreatGroup | -0.091***              | 0.011***               |
| WaveNum =<br>3 × TreatGroup | 0                      | 0.135***               |
| Num.Obs.                    | 66                     | 99                     |
| R2                          | 0.205                  | 0.093                  |
| R2 Adj.                     | 0.138                  | 0.044                  |
| R2 Within                   | 0.002                  | 0.003                  |
| R2 Within Adj.              | -0.032                 | -0.019                 |
| AIC                         | 114.9                  | 179.6                  |
| BIC                         | 128                    | 195.1                  |
| RMSE                        | 0.53                   | 0.56                   |
| Std.Errors                  | by: W1_ExperimentGroup | by: W1_ExperimentGroup |
| FE:<br>W1_ExperimentGroup   | X                      | X                      |
| FE: WaveNum                 | X                      | X                      |

\* p < 0.1, \*\* p < 0.05, \*\*\* p < 0.01



### **S2.7 Section 4.3.5.3**

Quiz on geocultural relationship, score—Overall

|                             | <b>Overall</b>         | <b>By Wave</b>         |
|-----------------------------|------------------------|------------------------|
|                             | -0.008***              |                        |
| WaveNum =<br>2 × TreatGroup |                        | 0.026***               |
| WaveNum =<br>3 × TreatGroup |                        | -0.043***              |
| Num.Obs.                    | 312                    | 312                    |
| R2                          | 0.044                  | 0.044                  |
| R2 Adj.                     | 0.031                  | 0.028                  |
| R2 Within                   | 0.000                  | 0.000                  |
| R2 Within Adj.              | -0.003                 | -0.006                 |
| AIC                         | 908.4                  | 910.3                  |
| BIC                         | 927.1                  | 932.8                  |
| RMSE                        | 1.02                   | 1.02                   |
| Std.Errors                  | by: W1_ExperimentGroup | by: W1_ExperimentGroup |
| FE: W1_ExperimentGroup      | X                      | X                      |
| FE: survey_wave             | X                      |                        |
| FE: WaveNum                 |                        | X                      |

\* p < 0.1, \*\* p < 0.05, \*\*\* p < 0.01

Quiz on geocultural relationship, score—Separated by level of expertise

|                             | <b>Specialist</b>      | <b>Non-Specialist</b>  |
|-----------------------------|------------------------|------------------------|
| WaveNum =<br>2 × TreatGroup | -0.098***              | 0.124***               |
| WaveNum =<br>3 × TreatGroup | -0.133***              | 0.038***               |
| Num.Obs.                    | 144                    | 168                    |
| R2                          | 0.065                  | 0.039                  |
| R2 Adj.                     | 0.031                  | 0.009                  |
| R2 Within                   | 0.001                  | 0.001                  |
| R2 Within Adj.              | -0.014                 | -0.012                 |
| AIC                         | 431.0                  | 488.0                  |
| BIC                         | 448.8                  | 506.7                  |
| RMSE                        | 1.04                   | 1.00                   |
| Std.Errors                  | by: W1_ExperimentGroup | by: W1_ExperimentGroup |
| FE:<br>W1_ExperimentGroup   | X                      | X                      |
| FE: WaveNum                 | X                      | X                      |

\* p < 0.1, \*\* p < 0.05, \*\*\* p < 0.01
